# Supplementary figures and images for: The prevalence of stunting, overweight and obesity, and metabolic disease risk in rural South African children
Source: Springer Nature journal article supplement (doi:10.1186/1471-2458-10-158), 2010-03-25

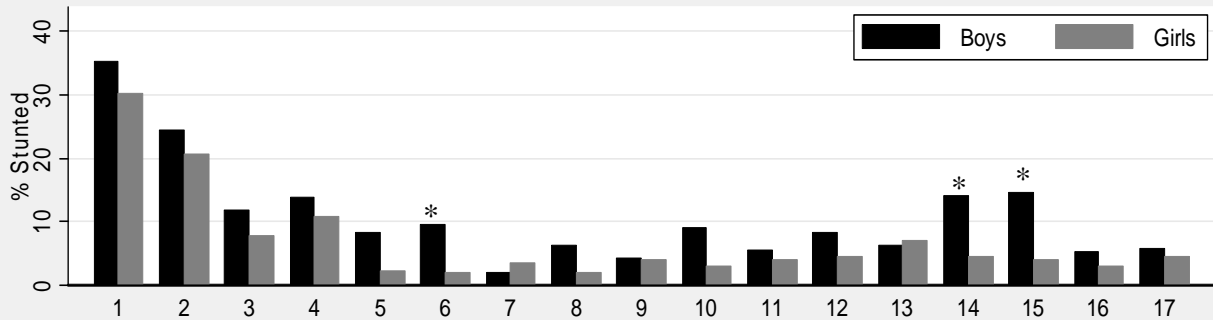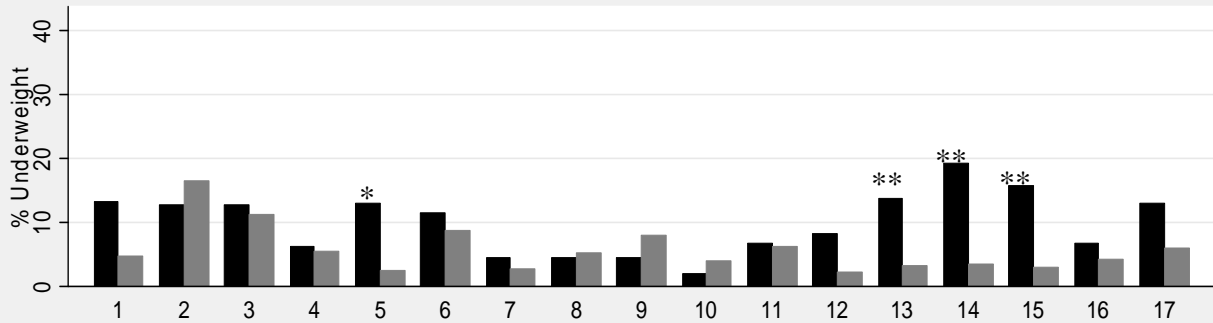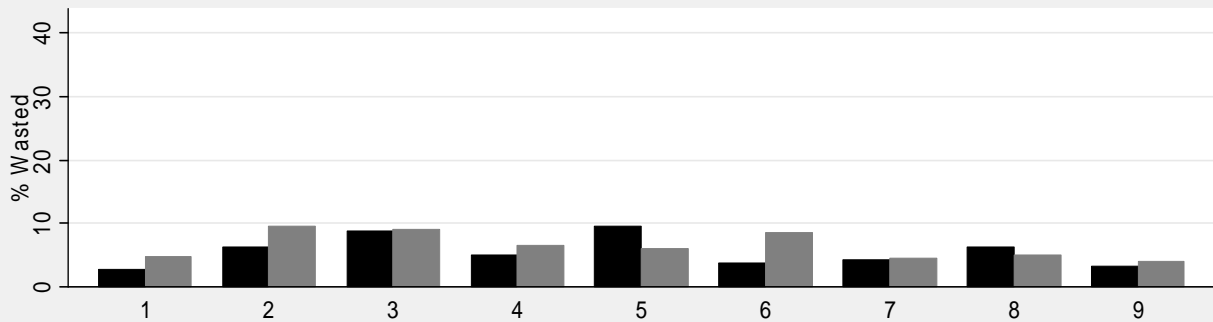

Supplement: 12889_2009_2069_MOESM1_ESM.pdf [file 12889_2009_2069_MOESM1_ESM.pdf]

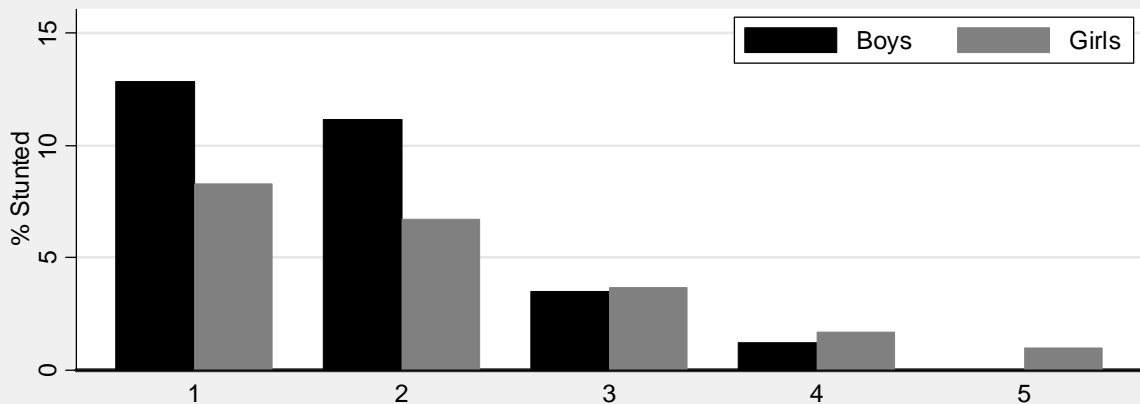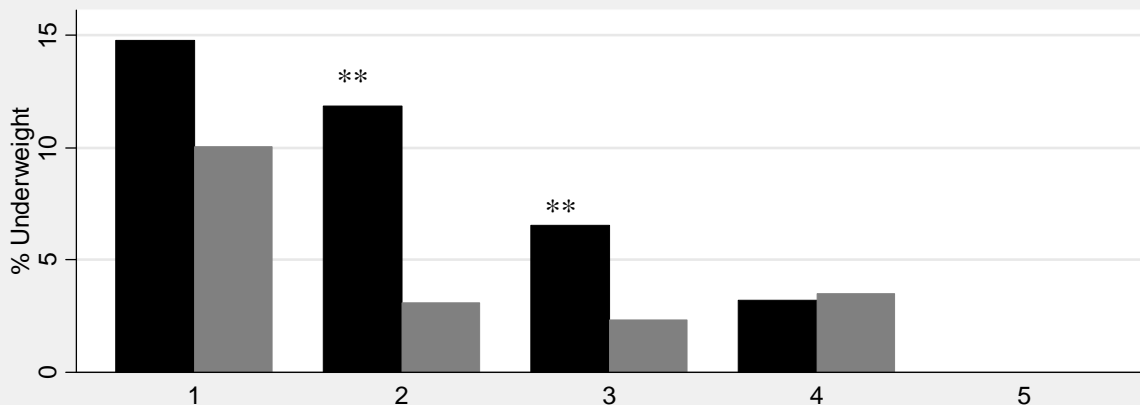

Supplement: 12889_2009_2069_MOESM2_ESM.pdf [file 12889_2009_2069_MOESM2_ESM.pdf]

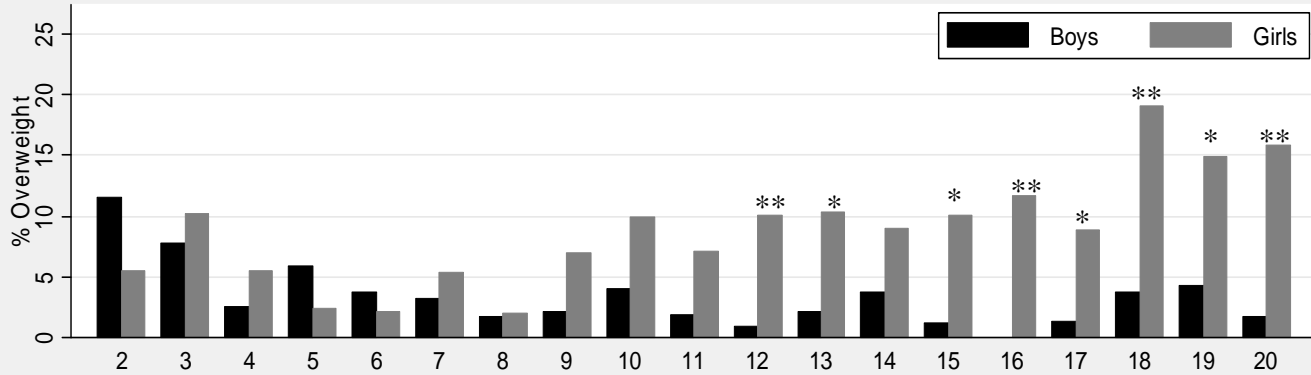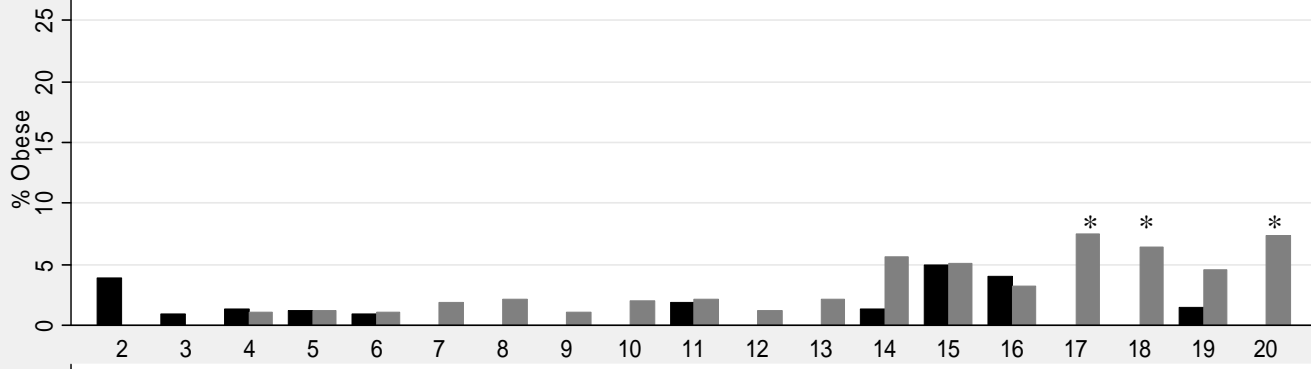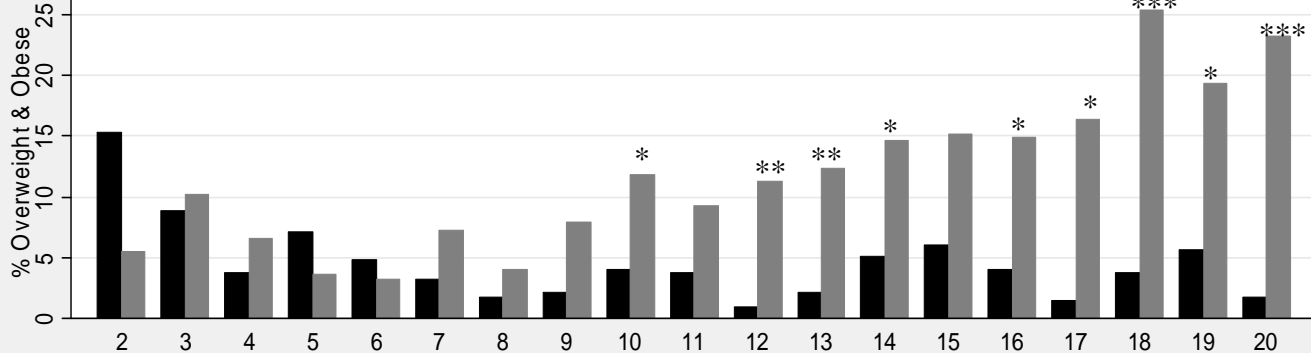

Supplement: 12889_2009_2069_MOESM3_ESM.pdf [file 12889_2009_2069_MOESM3_ESM.pdf]

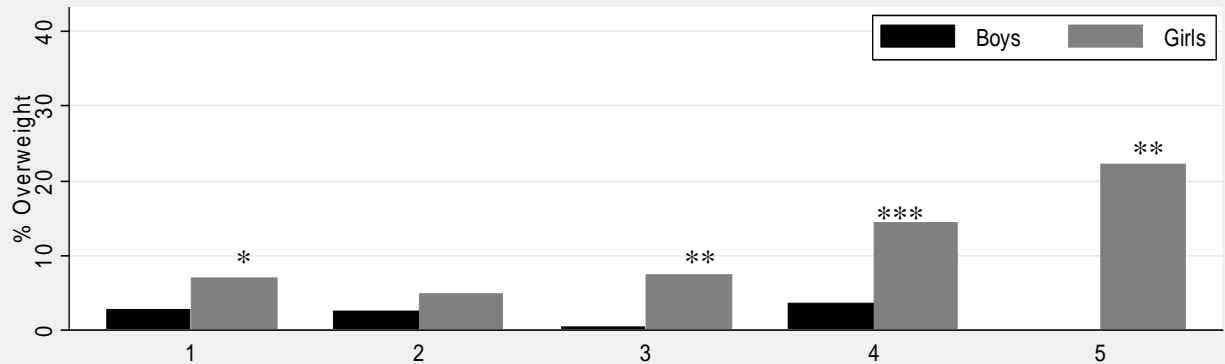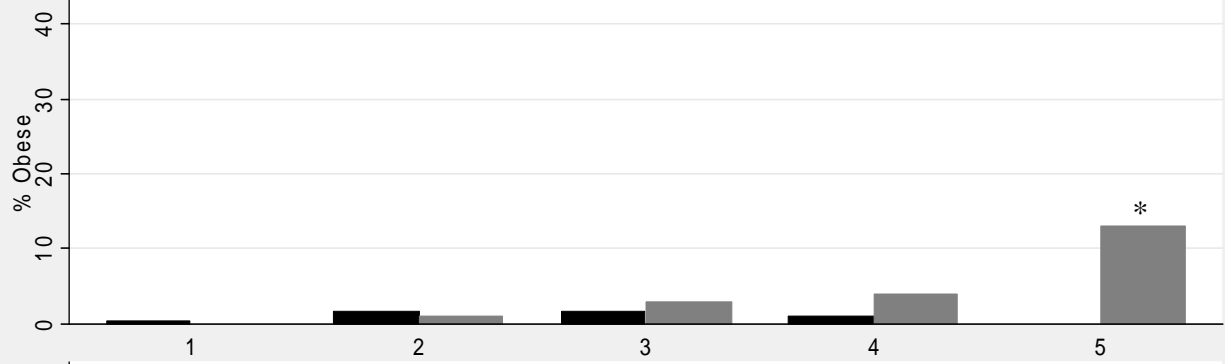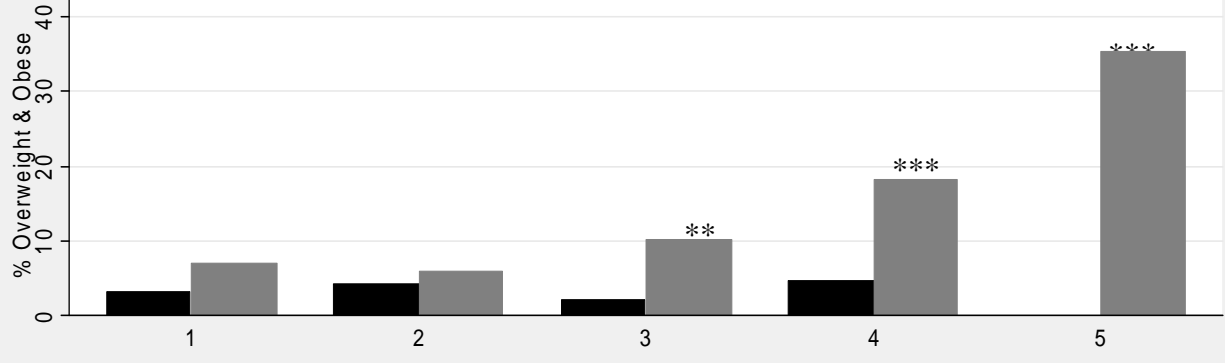

Supplement: 12889_2009_2069_MOESM4_ESM.pdf [file 12889_2009_2069_MOESM4_ESM.pdf]

## Waist circumference

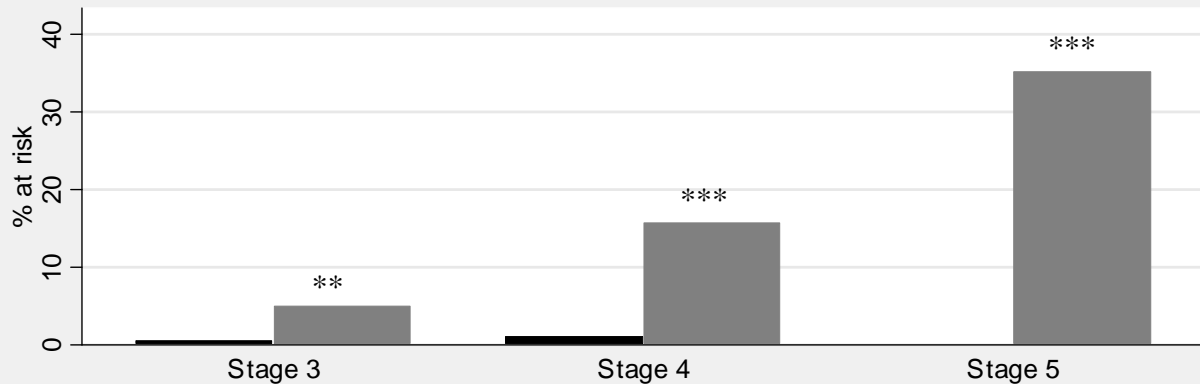

## Waist-to-height ratio

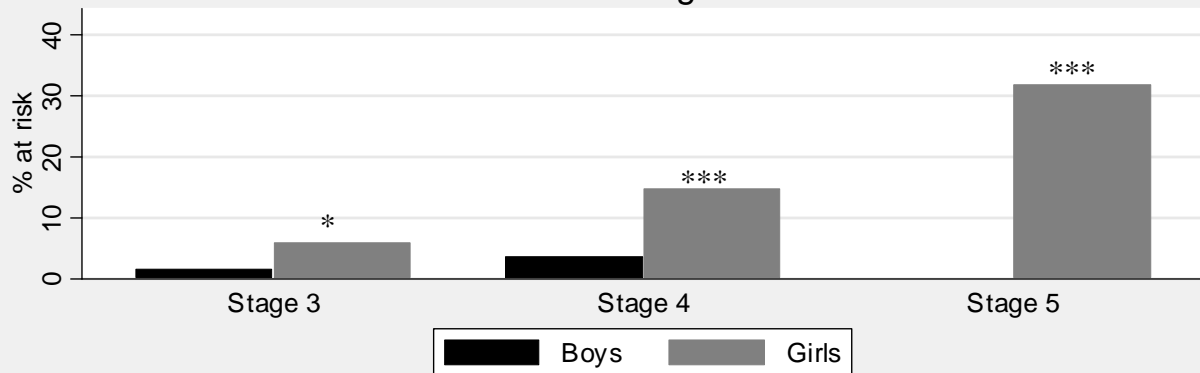

Supplement: 12889_2009_2069_MOESM5_ESM.pdf [file 12889_2009_2069_MOESM5_ESM.pdf]
